# Supplementary material
Source: PubMed Central journal article supplement (PMC3767524)
Supplement: 1302569110_pnas.201302569SI.pdf [file 1302569110_pnas.201302569SI.pdf]

# Supporting Information

Lanz et al. 10.1073/pnas.1302569110

## SI Materials and Methods

**Microarray Analysis.** After mouse brain microvascular endothelial cells (MBMEC) culture for 1 wk, one half had been treated for 24 h with tumor necrosis factor (TNF)- $\alpha$  500 U/mL and interferon (IFN)- $\gamma$  500 U/mL (“inflamed” setting) whereas the other half had been left “naïve.” For the last 8 h of culture, half of each group had been treated with LY-317615 to obtain the following conditions: (i) naïve, DMSO control; (ii) naïve with 5  $\mu$ M LY-317615; (iii) inflamed setting, LY-317615 treatment; and (iv) inflamed setting with 5  $\mu$ M LY-317615. Samples were prepared as biological triplicates. Total RNA from MBMEC was isolated using the TRIzol Plus (Invitrogen) RNA purification method according to the manufacturer’s instructions. The quality and concentration of total RNA was checked by gel analysis using the total RNA Pico chip assay on an Agilent 2100 Bioanalyzer (Agilent Technologies GmbH). Hybridization to microarrays (Mouse WG-6 v2.0 Expression BeadChip; Illumina Inc.) was performed according to the manufacturer’s recommended experimental protocol. Microarray scanning was done using an iScan array scanner (Illumina Inc.). Data extraction was done for all beads individually, and outliers were removed when the absolute difference to the median was greater than 2.5 times. All remaining bead-level data points were then quantile-normalized (1). Differentially expressed genes were identified by using Student *t* test on log-transformed data (*P* values were two-sided). Benjamini–Hochberg correction was used to control the false discovery rate (FDR). Hypergeometric enrichment analysis of Kyoto Encyclopedia of Genes and Genomes (KEGG) pathways among the differentially expressed genes (FDR < 0.05 and fold change > 1.2) between LY-317615–treated and control-treated endothelial cells was performed using Graphite Web with Benjamini–Hochberg correction (2).

**Phospho-Kinase Antibody Array.** After 1 wk of culture, MBMEC, as well as human umbilical vein endothelial cells (HUVEC) (PromoCell), were stimulated with 1  $\mu$ M LY-317615 for 8 h. The human phospho-kinase antibody array was purchased from R&D and performed with protein lysates of the two cell lines according to the manufacturer’s instructions. The manufacturer had assured that 15 of the 45 included antibody sets had been tested to cross-react with mouse proteins [p38alpha, c-Jun N-terminal kinases (JNK) pan, glycogen synthase kinase (GSK)-3 alpha/beta, mitogen and stress activated protein kinase (MSK) 1/2, 5' AMP-activated protein kinase (AMPK)alpha1, Akt (S473), cAMP response element-binding protein (CREB), beta-Catenin, p70S6K (T421/S424), c-Jun, signal transducer and activator of transcription (STAT)5a, p70S6K (T389), ribosomal s6 kinase (RSK) 1/2/3, STAT3, and STAT5 a/b]. Another set of 5 antibodies [extracellular-signal regulated kinase (ERK)1/2, target of rapamycin (TOR), Src, Fyn, and focal adhesion kinase (FAK)] are putatively targeting their corresponding murine target proteins. Chemoluminescence was detected using an Agfa Classic E.O.S. developer with exposure times between 30 s and 30 min. Distinct detection of phosphorylated GSK3 $\beta$  was performed by Western blot analysis as described above and analyzed the same way. Scanned images were analyzed using Fiji software (3). Each signal was manually selected, and integrated density was measured as average gray value per pixel. Before statistical analysis, background subtraction was performed.

**Adoptive Transfer.** For induction of EAE by adoptive transfer of leukocytes, mice were immunized as described above. On day 9

after immunization, thus before onset of EAE symptoms, mice were killed, lymph nodes and spleens were mechanically disrupted, and cells were seeded in an upright cell-culture flask at a concentration of  $7.5 \times 10^6$  cells per mL in enriched RPMI 1640 (supplemented with 10% (vol/vol) FBS, 100 U/mL penicillin, 0.1 mg/mL streptomycin, 1 mM Sodium Pyruvate (all from PAA), 0.1 mM nonessential amino acids (Lonza), 25 mM Hepes (Sigma), and 2 mM L-glutamine (Gibco/Invitrogen) containing MOG<sub>35–55</sub> 10  $\mu$ g/mL. After 3 d, cells were washed twice with PBS and injected i.p. into naïve SJL mice. Daily LY-317615 treatment of the recipient mice had started 3 d before the injection.

**Immunohistochemistry.** Mice were anesthetized by i.p. injection of 100 mg/kg ketamin and 20 mg/kg xylazin and then perfused with 50 mL of PBS by heart puncture. Brains and spinal cords were taken out and fixed in 4% (vol/vol) paraformaldehyde for 24 h and then transferred into 30% (wt/vol) sucrose for further storage. For detection of Evans Blue staining, macroscopic pictures were taken from spinal cords. For hematoxylin/eosin (H&E) and luxol-PAS staining, tissues were embedded in paraffin blocks and cut into 10- $\mu$ m sections. Stainings were performed according to standard protocols. For immunohistochemistry of claudin 5, CD31, and CD3, spinal cords were shock-frozen in liquid nitrogen after perfusion. Tissue was cut into 30- $\mu$ m slices (for claudin 5 and CD31) and into 10- $\mu$ m slices (for CD3) using a cryomicrotome (Leica). Before staining, slices were fixed with Acetone for 10 min at  $-20^\circ\text{C}$  and then stained with the primary antibodies rat anti-mouse CD31 (BD Pharmingen), rabbit anti-claudin 5 (Invitrogen), and rabbit anti-CD3 (DAKO) according to standard protocols. Microscopy images were taken using an NiE inverted automated microscope and an A1R confocal microscope (Nikon). Statistical evaluation of infiltrating immune cells was obtained from H&E stainings by manually counting lesions of infiltrating cells. Demyelination was evaluated by manually counting demyelinated areas in luxol-PAS–stained spinal-cord slides, correlating it to the following score: 0.5, single demyelinated spot; 1, several spots; 2, confluent sites of demyelination; 3, demyelination of one half of the spinal cord; and 4, demyelination of more than half of the spinal cord. For statistical evaluation of CD3 lesion morphology, lesions larger than 10 cells were counted per cord section and were clustered into two groups: spread (lesion in which T cells have no connection to each other or to a vessel wall and were dispersed into the tissue) and confined (more than 70% of stained cells were stuck in one circumscribed vessel and a clear border of the lesions was easily visible). Morphological analyses and manual counting were carried out by a blinded investigator. All statistical evaluations were carried out in multiple slides of multiple animals as indicated in the corresponding figure legend.

**Intracellular Detection of Cytokines by Flow Cytometry.** For flow cytometric intracellular detection of cytokines, LY-317615 treatment started on the day of immunization. Lymph nodes were harvested 9 d after immunization and mechanically singularized as described above. Then  $10^6$  cells per well were seeded for 5 h in 24-well plates (TPP) in enriched RPMI with 20 ng/mL PMA, 1  $\mu$ g/mL ionomycin, and 5  $\mu$ g/mL brefeldin A (Sigma). Cells were stained for CD4 (BioLegend) and then permeabilized with cytofix/cytoperm solutions (BD Bioscience) and stained for IFN- $\gamma$ , IL-17, and FoxP3 (ebioscience) according to standard protocols.







A

| naive setup |                                           |         |               |                |           |  |
|-------------|-------------------------------------------|---------|---------------|----------------|-----------|--|
| index       | pathway                                   | p value | pathway genes | affected genes | status    |  |
| 1           | NF-kappa B signaling pathway              | 0,01123 | 74            | 11             | inhibited |  |
| 2           | Osteoclast differentiation                | 0,03385 | 110           | 13             | inhibited |  |
| 3           | Cholinergic synapse                       | 0,03491 | 93            | 11             | inhibited |  |
| 4           | Glutamatergic synapse                     | 0,03491 | 85            | 10             | activated |  |
| 5           | Chagas disease (American trypanosomiasis) | 0,04026 | 89            | 10             | activated |  |
| 6           | Dopaminergic synapse                      | 0,04286 | 115           | 12             | inhibited |  |
| 7           | Vascular smooth muscle contraction        | 0,04471 | 106           | 11             | inhibited |  |

  

| inflamed setup |                                             |                |               |                |                  |  |
|----------------|---------------------------------------------|----------------|---------------|----------------|------------------|--|
| index          | pathway                                     | p value        | pathway genes | affected genes | status           |  |
| 1              | NF-kappa B signaling pathway                | 0.00004        | 74            | 19             | activated        |  |
| 2              | Chronic myeloid leukemia                    | 0.00028        | 71            | 17             | inhibited        |  |
| 3              | Renal cell carcinoma                        | 0.00030        | 61            | 15             | inhibited        |  |
| 4              | Pancreatic cancer                           | 0.00032        | 68            | 16             | inhibited        |  |
| 5              | Epstein-Barr virus infection                | 0.00370        | 80            | 16             | inhibited        |  |
| 6              | Prostate cancer                             | 0.00370        | 87            | 17             | inhibited        |  |
| 7              | HIF-1 signaling pathway                     | 0.00558        | 104           | 19             | inhibited        |  |
| 8              | <b>Leukocyte transendothelial migration</b> | <b>0.00678</b> | <b>86</b>     | <b>16</b>      | <b>inhibited</b> |  |
| 9              | Toll-like receptor signaling pathway        | 0.00678        | 93            | 17             | activated        |  |
| 10             | Herpes simplex infection                    | 0.00820        | 102           | 18             | activated        |  |
| 11             | Influenza A                                 | 0.00931        | 104           | 18             | activated        |  |
| 12             | <b>TGF-beta signaling pathway</b>           | <b>0.00931</b> | <b>83</b>     | <b>15</b>      | <b>inhibited</b> |  |
| 13             | Fc gamma R-mediated phagocytosis            | 0.01243        | 86            | 15             | inhibited        |  |
| 14             | Jak-STAT signaling pathway                  | 0.01244        | 100           | 17             | inhibited        |  |
| 15             | Chagas disease (American trypanosomiasis)   | 0.01747        | 89            | 15             | inhibited        |  |
| 16             | Neurotrophin signaling pathway              | 0.01821        | 112           | 18             | inhibited        |  |
| 17             | Osteoclast differentiation                  | 0.03118        | 110           | 17             | inhibited        |  |
| 18             | Measles                                     | 0.04131        | 98            | 15             | activated        |  |
| 19             | Cell cycle                                  | 0.04522        | 115           | 17             | inhibited        |  |

Fig. S4. (Continued)

**B** Pathway Leukocyte transendothelial migration

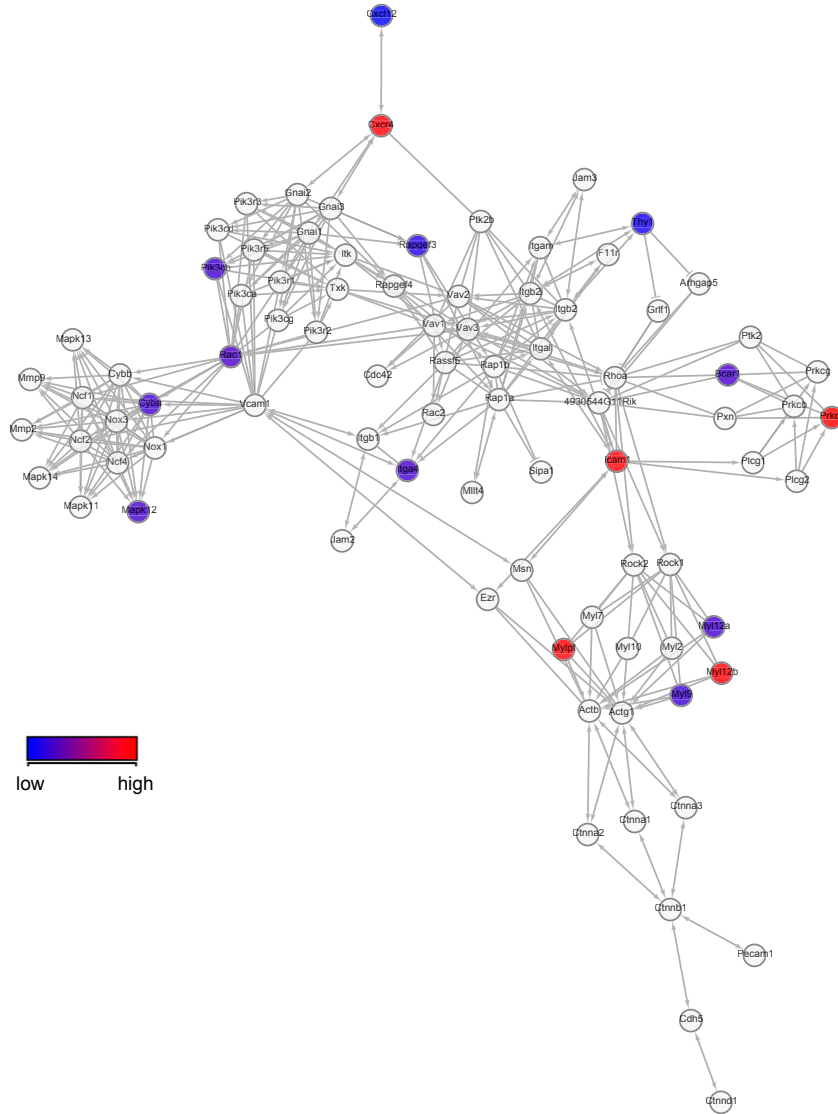

Fig. S4. (Continued)

**C** TGF- $\beta$  signaling pathway

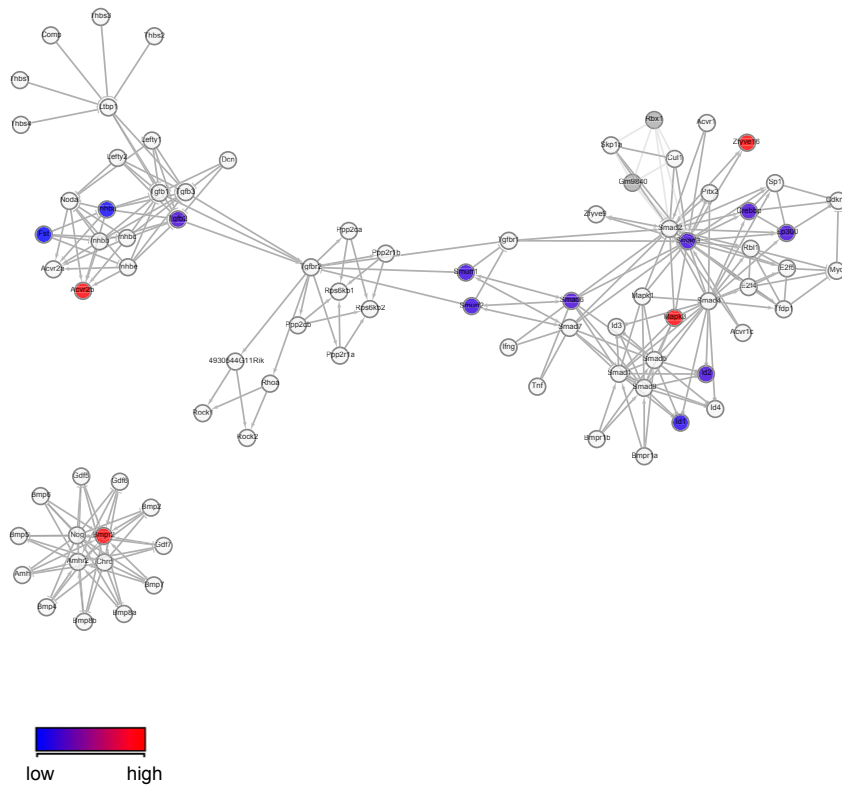

**Fig. S4.** Microarray mRNA expression analysis. MBMEC were cultured for 8 h in the presence of LY-317615 either in a naïve or an inflamed in vitro setting [containing TNF- $\alpha$  (500 U/mL) and IFN- $\gamma$  (500 U/mL)]. Microarray was performed from three biological replicates of each sample. (A) Hypergeometric enrichment analysis of KEGG pathways among the differentially expressed genes (FDR < 0.05 and fold change > 1.2). (B) Pathway leukocyte transendothelial migration. (C) TGF- $\beta$  signaling pathway. Red Genes are highly expressed, and blue genes are suppressed in LY-317615-treated MBMEC.

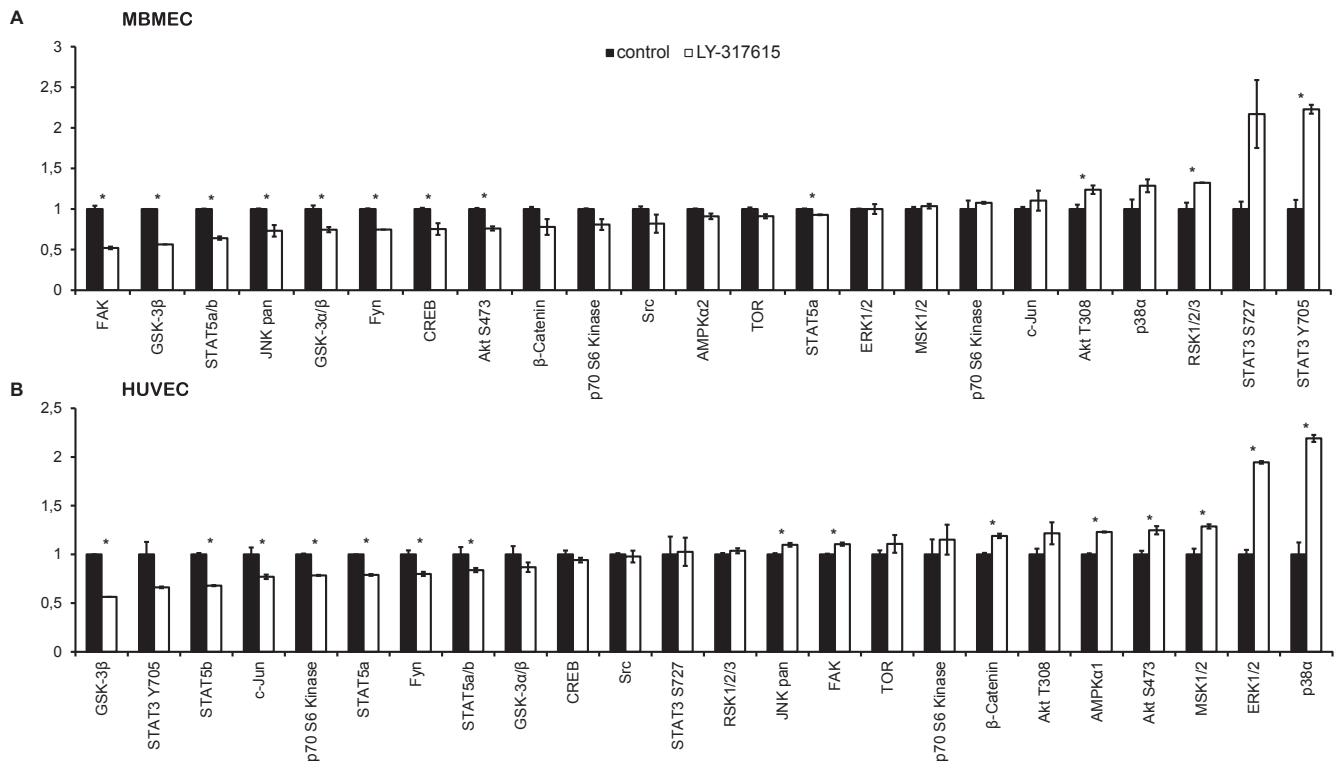

**Fig. S5.** Phospho-kinase antibody array. Cell lysates from (A) MBMEC and (B) HUVEC were tested on phosphorylation of 23 proteins. Mean  $\pm$  SD from two replicates are shown. \* $P < 0.05$  according to Student *t* test.

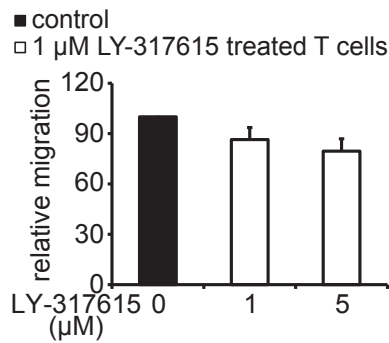

**Fig. S6.** Empty-field migration of T cells. T-cell migration through transwell without layer of endothelial cells as a control for the data shown in Fig. 3.
